1 Gegenhuber et al.

*OPRM1*,  $\beta$ -endorphin, and alcohol dependence

1  
2  
3  
4  
5  
6  
7  
8  
9  
10  
11  
12  
13  
14  
15  
16  
17  
18  
19  
20  
21  
22  
23

**Original Article**

***OPRM1* A118G and serum  $\beta$ -endorphin interact with sex and digit ratio (2D:4D) to influence risk and course of alcohol dependence**

Jordan Bruno Gegenhuber ([gegenhu@cshl.edu](mailto:gegenhu@cshl.edu)), Christian Weinland ([christian.weinland@uk-erlangen.de](mailto:christian.weinland@uk-erlangen.de)), Johannes Kornhuber ([johannes.kornhuber@uk-erlangen.de](mailto:johannes.kornhuber@uk-erlangen.de)), Christiane Mühle\* ([christiane.muehle@uk-erlangen.de](mailto:christiane.muehle@uk-erlangen.de)), Bernd Lenz\* ([bernd.lenz@uk-erlangen.de](mailto:bernd.lenz@uk-erlangen.de))

Department of Psychiatry and Psychotherapy, Friedrich-Alexander University Erlangen-Nürnberg (FAU), Germany

\*These authors contributed equally.

Main affiliation address:

Department of Psychiatry and Psychotherapy, Friedrich-Alexander University Erlangen-Nürnberg (FAU), Schwabachanlage 6, D-91054 Erlangen, Germany, Phone: +49 9131 85-33001, Fax: +49 9131 85-34105

Present address of corresponding author:

Cold Spring Harbor Laboratory, One Bungtown Road, Cold Spring Harbor, NY 11724, Phone: +1 541 228-1370, E-Mail: [gegenhu@cshl.edu](mailto:gegenhu@cshl.edu)

24 **Abstract**

25           Activation of mesolimbic mu-opioid receptor by its endogenous ligand,  $\beta$ -endorphin, mediates  
26 part of the rewarding effects of alcohol, yet there is controversial evidence surrounding the  
27 relationship between the functional mu-opioid receptor gene (*OPRM1*) A118G single nucleotide  
28 polymorphism and alcohol dependence risk. Some preclinical evidence suggests that sex and sex  
29 hormone-dependent prenatal brain organization may interact with the opioid system to influence  
30 alcohol drinking behavior. We genotyped 200 alcohol-dependent patients and 240 healthy individuals  
31 for the A118G variant and measured serum  $\beta$ -endorphin level at recruitment and during acute  
32 withdrawal. We then evaluated the association between these factors and alcohol dependence risk and  
33 outcome in the context of both sex and second-to-fourth digit length ratio (2D:4D) – a biomarker of  
34 prenatal sex hormone load. For the first time, the AA genotype was found to be associated with  
35 elevated alcohol-related hospital readmission risk, more readmissions, and fewer days until first  
36 readmission in male but not female patients. Upon accounting for 2D:4D, the G-allele predicted  
37 alcohol dependence and more readmissions (1 vs  $\geq 2$ ) in males, suggesting prenatal sex hormones  
38 interact with *OPRM1* to influence addiction pathology. Withdrawal  $\beta$ -endorphin level also correlated  
39 negatively with withdrawal severity in females but not in males, indicating  $\beta$ -endorphin might protect  
40 against withdrawal-induced stress in a sex-specific manner. Organizational effects of sex hormones  
41 may prime individuals for alcohol dependence by inducing permanent changes to the endogenous  
42 opioid system.

43

44 **Keywords:** mu-opioid receptor gene (*OPRM1*); A118G;  $\beta$ -endorphin; alcohol dependence; prenatal  
45 sex hormones

46

47

48

49

50

51

52 **1. Introduction**

53           Activation of mesolimbic mu-opioid receptor (MOR) by its primary endogenous ligand,  $\beta$ -  
54 endorphin ( $\beta$ -END), has been shown to mediate part of the rewarding effects of alcohol via stimulating  
55 nucleus accumbens dopamine release (Heilig et al., 2011). For this reason, MOR and  $\beta$ -END are  
56 considered high-interest pharmacological targets for the treatment and prevention of alcohol  
57 dependence and relapse. The relatively common single nucleotide polymorphism (SNP) rs1799971  
58 within exon 1 of the mu-opioid receptor gene (*OPRM1*), in which an adenine-guanine transition  
59 (A118G) encodes for an asparagine-aspartic acid substitution (N40D), has been studied in the context  
60 of alcohol dependence due to its strong yet opposing effects on receptor function and expression. The  
61 G-allele has been reported to increase binding affinity for  $\beta$ -END three-fold (Bond et al., 1998) and  
62 cause a four-fold increase in ventral striatal dopamine release following alcohol stimulation  
63 (Ramchandani et al., 2011) but also reduce *OPRM1* mRNA and protein level in human post-mortem  
64 brain tissue and transfected Chinese hamster ovary cells (Zhang et al., 2005).

65           Despite these potent functional effects, previous meta-analyses have been unable to establish a  
66 clear association between *OPRM1* A118G and alcohol dependence in humans (Chen et al., 2012;  
67 Schwantes-An et al., 2016). Several studies have found the G-allele to be associated with elevated  
68 dorsal striatal cue-reactivity (Bach et al., 2015), craving (van den Wildenberg et al., 2007), and  
69 subjective feelings of stimulation and happiness (Ray et al., 2004; 2013) following alcohol  
70 consumption. However, epidemiological research and meta-analyses have linked both the A- and G-  
71 allele to increased risk of alcohol dependence amongst European cohorts consisting of both sexes  
72 (Bart et al., 2005; Schwantes-An et al., 2016). This inconsistency may be due to an inability or failure  
73 to account for certain confounding factors.

74           There is evidence suggesting that sex-*OPRM1*, sex- $\beta$ -END, and prenatal sex hormone-*OPRM1*  
75 interactions may influence addiction pathology. Barr et al. (2007) found that the G-allele of the  
76 primate equivalent of the A118G SNP significantly increases alcohol-induced stimulation, ethanol  
77 consumption, alcohol preference, and percentage of days intoxicated in male but not female rhesus  
78 macaques. In a humanized mouse model carrying this polymorphism, male GG mice self-administered  
79 more nicotine than male AA mice, whereas there was no difference in female animals (Bernardi et al.,

80 2016). A different mouse model containing a point mutation (A112G) equivalent to the human A118G  
81 SNP also revealed male GG mice tend to have a higher conditioned place preference for a morphine-  
82 paired environment than male AA mice (Mague et al., 2009). In humans, naltrexone, a MOR  
83 antagonist, significantly and dose-dependently reduces the number of heavy drinking days in males  
84 but not in females (Garbutt et al., 2005). However, few studies have investigated sex-specific *OPRM1*  
85 genotype effects on alcohol dependence in a clinical cohort. Based on preliminary evidence, we  
86 hypothesize that the A118G SNP as well as three additional *OPRM1* promoter variants relate more  
87 strongly to alcohol dependence risk and outcome in males or females than in the combined cohort.  
88 Furthermore, since male heavy drinker plasma  $\beta$ -END level has been shown to be higher than in  
89 female heavy drinkers (Gianoulakis et al., 2003), peripheral  $\beta$ -END levels in patients, before and  
90 during withdrawal, and in healthy individuals were investigated on a sex-specific basis.

91 Recent evidence has also revealed an interaction between prenatal testosterone level and  
92 *OPRM1* influencing alcohol consumption in rodents (Huber et al., in press). In humans, elevated  
93 exposure to androgens during the prenatal development window has been associated with increased  
94 risk of alcohol dependence (Kornhuber et al., 2011; Lenz et al., 2017) and other behavioral disorders  
95 such as video game addiction (Kornhuber et al., 2013). From a mechanistic standpoint, sex hormones  
96 have been shown to induce permanent, organizational changes to the brain's reward system at the  
97 neuronal and molecular level (Brown et al., 2015). Huber et al. (in press) found in mice that prenatal  
98 treatment with flutamide, a potent androgen receptor antagonist, caused a significant reduction in adult  
99 ventral striatal *OPRM1* RNA and a significant increase in alcohol self-administration. Given this  
100 finding, we decided to also investigate prenatal sex hormone-*OPRM1* effects on alcohol dependence  
101 and outcome, using the second-to-fourth digit length ratio (2D:4D) as a biomarker for prenatal sex  
102 hormone load (Berenbaum et al., 2009; Zheng and Cohn, 2011).

103

## 104 **2. Methods**

105

### 106 *2.1 Cohort characteristics*

107 The individuals included in this investigation were recruited between 2013 and 2014 for the  
108 **Neurobiology of Alcoholism (NOAH)** study at the Universitätsklinikum Erlangen Department of  
109 Psychiatry and Psychotherapy and the Klinikum am Europakanal Clinic for Psychiatry,  
110 Psychotherapy, and Psychosomatic Medicine in Erlangen, Germany (Lenz et al., 2017). 200 early-  
111 abstinent, alcohol-dependent patients (113 males and 87 females) admitted as inpatients for  
112 withdrawal treatment were selected through an intensive screening process, and 240 healthy controls  
113 (133 males and 107 females) were selected after two telephone screenings and an on-site interview, in  
114 which individuals with prior psychiatric inpatient treatment and/or any psychiatric outpatient treatment  
115 during the past ten years were excluded. Median age (years) for both patients and controls was 48  
116 (interquartile ranges [IQR] 42/54 and 39/56) (Mann-Whitney *U* test [MWT],  $p > 0.05$ ), and median  
117 body mass index ( $\text{kg}/\text{m}^2$ ) was 24.7 (IQR 22.1/28.2) and 26.5 (IQR 23.5/29.3) (MWT,  $p > 0.05$ ),  
118 respectively. In the patient group, median lifetime drinking (kg) and daily ethanol intake (g/d since  
119 onset) were 483 (IQR 270/1,195) and 120 (IQR 58/240). Whole blood, behavioral scores, and other  
120 parameters (Lenz et al., 2017) were collected at time of recruitment (day A) in patients and controls  
121 and a median of five days later (day B) in patients only, during which they underwent withdrawal. The  
122 German version of the Clinical Institute Withdrawal Assessment for Alcohol revised (CIWA-Ar) scale  
123 was used to measure alcohol withdrawal severity (Stuppaeck et al., 1994). Blood samples were  
124 collected in the morning for all individuals to minimize circadian effects on hormone level.  
125 Individuals' hands were scanned using the HP Scanjet G4050 (Hewlett-Packard, Palo Alto, CA,  
126 USA), and 2D:4D was calculated by three blinded raters, who measured the absolute lengths of the  
127 second and fourth digits (GNU Image Manipulation Program, [www.gimp.org](http://www.gimp.org)). Lower 2D:4D  
128 indicates higher prenatal androgen and lower estrogen load, and higher 2D:4D suggests the opposite.  
129 Medical records for each patient were accessed 24-months after study recruitment to investigate the  
130 number of alcohol-related hospital readmissions and days until first readmission.

131

132 *2.2 Blood preparation*

133 After collection, blood samples were centrifuged (10 min, 2000 g at room temperature), and  
134 serum was placed into storage at -80°C. Genomic DNA (gDNA) was extracted from whole blood  
135 using the Gentra Puregene Blood Kit (Qiagen, Venlo, Netherlands) and stored at 4°C.

136

### 137 2.3 Genotyping

138 Genotyping for three *OPRM1* SNPs (rs1799971 [A118G], rs3798677, rs3798678) was  
139 performed by high resolution melting (HRM) of polymerase chain reaction (PCR) products in the  
140 Roche LightCycler 480 II (Roche Holding AG, Basel, Switzerland). The PCR primer sequences are  
141 listed in Table 1. The reaction mixture consisted of 1x Rovalab buffer and 0.1 U Taq polymerase  
142 (Rovalab GmbH, Teltow, Germany), 0.03  $\mu$ l CyGreen (1:100 dilution, Enzo Life Sciences Inc.,  
143 Farmingdale, NY, USA), 10 ng gDNA, 1.5-3.0 mM MgCl<sub>2</sub> (Table 1), 200  $\mu$ M dNTPs (each), and 200  
144 nM forward and reverse primers (Sigma-Aldrich, St. Louis, MO, USA) in a total volume of 10  $\mu$ l.  
145 PCR conditions were: 2 min at 95°C followed by 40 x (15s at 95°C, 30s at primer-specific annealing  
146 temperatures [Tab. 1] 15s at 72°C). After PCR, product denaturation was performed at 95°C for one  
147 minute, followed by rapid cooling to 40°C. A melting curve was generated by heating at 0.02°C/s  
148 from 70°C to 90°C, and analysis was performed using the Roche LightCycler 480 Gene Scanning  
149 Software v1.5. Genotypes for the three SNPs were confirmed by Sanger sequencing of gDNA samples  
150 selected to act as standards (AA, AG, GG for each SNP).

151 Genotyping for the *OPRM1* CAn dinucleotide repeat polymorphism, described in Kranzler et  
152 al. (1998), was performed by fragment length analysis of PCR products in an Applied Biosystems 48-  
153 capillary array (Thermo Fisher Scientific, Waltham, MD, USA). The PCR primer sequences were the  
154 same as for genotyping rs3798678 except the forward primer was fluorescently tagged with 6-  
155 fluorescein amidite (Sigma-Aldrich, St. Louis, MO, USA). PCR reaction mixture and conditions were  
156 the same as for the rs3798678 HRM-PCRs, except for the absence of the CyGreen intercalating dye.  
157 Following PCR, products were diluted 1:20 in MilliQ water, and 1  $\mu$ l of the dilution was mixed with  
158 10  $\mu$ l formamide (Sigma-Aldrich) and 0.5  $\mu$ l GeneScan 500 ROX dye size standard (Thermo Fisher  
159 Scientific) prior to fragment length analysis. CAn genotypes were confirmed by Sanger sequencing.

160 10% of all samples' genotypes for the polymorphisms were replicated with 100% accordance.  
161 The four genetic variants were in Hardy-Weinberg equilibrium within the NOAH cohort (rs1799971  
162 [A118G]:  $\chi^2 = 0.180$ ,  $p = 0.672$ ; rs3798677:  $\chi^2 = 1.521$ ,  $p = 0.217$ ; rs3798678:  $\chi^2 = 1.521$ ,  $p = 0.217$ ;  
163 CAn:  $\chi^2 = 13.550$ ,  $p = 0.809$ ).

164

#### 165 *2.4 $\beta$ -END quantification by enzyme-linked immunosorbent assay (ELISA)*

166 Serum  $\beta$ -END was quantified using the Endorphin, beta (Human) EIA Kit by Phoenix  
167 Pharmaceuticals, Inc. (Burlingame, CA, USA) following the manufacturer's guidelines. 25  $\mu$ l of  
168 original, unpurified serum were assayed in duplicate, and peptide concentrations were extrapolated  
169 from a standard curve (7 dilutions from 30 ng/ml to 0.01 ng/ml), which was run on every 96-well plate  
170 to minimize risk of interplate variation. The intra-assay and inter-assay coefficients of variation were  
171 7% and 14%, respectively.

172

#### 173 *2.5 Statistics*

174 Alpha (two-tailed) was set to 0.5. If not otherwise stated, we report median and IQR. For  
175 group comparisons, we used MWTs, Kruskal-Wallis tests (KWTs), and Wilcoxon signed-rank tests.  
176 The Spearman's method was employed to evaluate bivariate correlations and  $\chi^2$  tests with odds ratios  
177 (OR) for differences in the frequencies. Log-rank [Mantel-Cox] tests were used for survival curves. To  
178 increase statistical power, heterozygous subjects were combined with homozygous minor allele  
179 individuals for SNP analysis (AA study subjects vs. G-allele carriers). In case of missing data points,  
180 study subjects were excluded from the specific analyses, and the exact case number is stated. Data  
181 were analyzed using IBM SPSS Statistics Version 21 for Windows (SPSS Inc., Chicago, IL, USA) and  
182 Graph Pad Prism 5 (Graph Pad Software Inc., San Diego, CA, USA).

183

### 184 **3. Results**

185

#### 186 *3.1 Trend for an association between OPRM1 A118G and alcohol dependence risk in females*

187 The *OPRM1* A118G genotype (AA vs. AG/GG) did not predict risk of alcohol dependence in  
188 the total cohort ( $\chi^2$  test; OR = 1.12 [95%-confidence interval (95%-CI) 0.71-1.76],  $\chi^2 = 0.233$ ,  $p =$   
189 0.629) or the male subgroup (OR = 0.81 [95%-CI 0.45-1.44],  $\chi^2 = 0.528$ ,  $p = 0.467$ ). However, there is  
190 a trend for AA females to have an elevated risk (OR = 1.91 [95%-CI 0.89-4.06],  $\chi^2 = 2.848$ ,  $p =$   
191 0.091).

192

### 193 *3.2 Sex-specific association between OPRM1 A118G and prospective alcohol-related hospital* 194 *readmission*

195 *OPRM1* A118G significantly predicted the outcome of male patients but not of female patients  
196 over the 24-month period following study recruitment. In males, the AA genotype was significantly  
197 associated with an elevated risk of alcohol-related hospital readmission (Males, readmitted:  $n(\text{AA}) =$   
198 62,  $n(\text{AG/GG}) = 14$ , non-readmitted:  $n(\text{AA}) = 21$ ,  $n(\text{AG/GG}) = 16$ ; females, readmitted:  $n(\text{AA}) = 38$ ,  
199  $n(\text{AG/GG}) = 8$ , non-readmitted:  $n(\text{AA}) = 37$ ,  $n(\text{AG/GG}) = 4$ ; Fig. 1A), higher median number of  
200 readmissions (Fig. 1B), and fewer mean days until first readmission (Fig. 1C). No significant  
201 associations between genotype and outcome were observed in females (readmitted:  $n(\text{AA}) = 38$ ,  
202  $n(\text{AG/GG}) = 8$ , non-readmitted:  $n(\text{AA}) = 37$ ,  $n(\text{AG/GG}) = 4$ ; Fig. 1A-B, D).

203

### 204 *3.3 No significant associations of rs3798677, rs3798678, and CAn polymorphisms with alcohol* 205 *dependence or outcome*

206 10 and 14-18 CAn repeats were detected within the NOAH cohort (Tab. 2). CAn allele length  
207 and genotype were investigated for associations with alcohol dependence or outcome in the NOAH  
208 cohort. Mean CAn allele length did not significantly predict risk of alcohol dependence or alcohol-  
209 related hospital readmission (MWTs), nor was it significantly correlated with number of readmissions  
210 or days until first readmission (Spearman-Rho) in both the total group and the male and female  
211 subgroups. Similarly, no significant associations were observed between CAn genotype and alcohol  
212 dependence or outcome ( $\chi^2$  tests, KWTs).

213

214 Promoter region SNPs rs3798677 (-73 bp relative to CAn) and rs3798678 (-3 bp relative to  
CAn) had identical genotypes in the cohort (Tab. 1) and were also found to be in strong linkage



215 disequilibrium with A118G (rs3798677 AA/G-allele carriers vs. A118G AA/G-allele carriers;  $\chi^2 =$   
216 8.287,  $p = 0.004$ ). Similar to the CAn promoter variant, rs3798677 and rs3798678 did not significantly  
217 predict dependence or outcome and were also not associated with the number of readmissions or days  
218 until first readmission ( $\chi^2$  tests, MWTs, Log-rank [Mantel-Cox] tests).

219

220 *3.4 Serum  $\beta$ -END level declines during acute withdrawal in male and female patients and relates to*  
221 *withdrawal severity*

222 At baseline, there was no significant difference in median serum  $\beta$ -END level between  
223 patients and controls in both males and females. During a median of five days withdrawal, patient  $\beta$ -  
224 END concentrations declined significantly to a level that was also significantly lower than in control  
225 subjects (Fig. 2A). Moreover, there was a significant negative correlation between withdrawal serum  
226  $\beta$ -END level (day B) and CIWA-Ar withdrawal severity score in female patients (Fig. 2B) but not in  
227 males (Spearman-Rho,  $n = 82$ ,  $\rho = -0.097$ ,  $p = 0.385$ ). No significant associations between patient  
228 serum  $\beta$ -END level and outcome were detected, except for one finding that day B  $\beta$ -END level was  
229 correlated with days until first readmission in males (Spearman-Rho,  $n = 94$ ,  $\rho = -0.232$ ,  $p = 0.025$ ).

230

231 *3.5 A118G-2D:4D interaction influences risk and outcome of alcohol dependence*

232 To test whether AA study subjects differ from G-allele carriers with regard to the effect of  
233 prenatal sex hormone load on risk of alcohol dependence, we sex- and genotype-specifically  
234 normalized patients' 2D:4D values to the mean 2D:4D and its standard deviation of the control group  
235 ( $=$  [each patient's 2D:4D value – mean controls' 2D:4D value] / standard deviation of controls' 2D:4D  
236 values). Male G-allele carrier patients differed significantly from AA male patients with regard to the  
237 normalized 2D:4D values (Fig. 3A), meaning a significantly stronger 2D:4D deviation between  
238 patients and controls in the G-allele carrier group than in the AA group. No significant 2D:4D-A118G  
239 interaction was observed in females (Fig. 3B). Subsequently, we explored whether similar interactions  
240 are also relevant to the patients' outcome. We previously reported a significant negative correlation  
241 between 2D:4D values and number of alcohol-related hospital readmissions during the 12-month  
242 follow-up in individuals with at least one readmission (Lenz et al., 2017). Thus, we sex- and genotype-

243 specifically normalized 2D:4D values of each patient with at least two readmissions to the mean  
244 2D:4D and standard deviation of patients with only one alcohol-related readmission during the follow-  
245 up (= [2D:4D value of each patient with one readmission – mean 2D:4D values of patients with at  
246 least two readmissions] / standard deviation of 2D:4D values of patients with at least two  
247 readmissions). In support of the previous finding, male G-allele carrier patients deviated significantly  
248 from AA male patients with regard to the normalized 2D:4D values (Fig. 3C), meaning a significantly  
249 stronger 2D:4D deviation between patients with one readmission and patients with at least two  
250 readmissions in the G-allele carrier group than in the AA group. No significant 2D:4D-A118G  
251 interaction with respect to alcohol-related readmission was found in females (Fig. 3D). These two  
252 observations suggest that in males, higher prenatal androgen (and lower estrogen) load interacts with  
253 the *OPRM1* A118G G-allele to elevate risk and worsen outcome of alcohol dependence.

254

#### 255 **4. Discussion**

256 Over the last 30 years, the proportion of neuroscience studies including both sexes has grown  
257 substantially, yet approximately 80% of such publications still fail to analyze results by sex despite  
258 clear sex differences in the risk and pathology of most major neuropsychiatric disorders, including  
259 alcohol dependence (Beery and Zucker, 2011). The present study aimed to investigate sex-specific  
260 *OPRM1* and  $\beta$ -END effects on alcohol dependence risk and outcome as well as prenatal sex hormone-  
261 *OPRM1* interactions.

262 In the NOAH cohort, the *OPRM1* A118G SNP did not predict alcohol dependence in either  
263 males or females but related sex-specifically to outcome. To our knowledge, this is the first  
264 publication to demonstrate that the AA genotype is associated with increased risk of alcohol-related  
265 hospital readmission, more readmissions, and fewer days until first readmission in male patients and  
266 therefore may be relevant for predicting relapse in a clinical setting. In previous naltrexone studies,  
267 Oslin et al. (2003) and O'Malley et al. (2008) found that placebo-treated AA alcohol-dependent  
268 patients were more likely to relapse than G-allele carriers, but this association did not achieve  
269 statistical significance – perhaps because a large proportion of the two study cohorts consisted of  
270 females. Schacht et al. (2017) also did not observe a significant difference in percentage of heavy

271 drinking days between AA individuals and G carriers, although the duration of their study (10 months)  
272 was shorter than ours (24 months). Considering the G allele has been shown to strongly increase MOR  
273 binding affinity for  $\beta$ -END, we hypothesize the AA genotype elevates readmission risk by  
274 hyposensitizing MOR, causing dependent patients to consume more alcohol in order to overcome  
275 intrinsic reward deficit (Kleinjan et al., 2015).

276 Interestingly, we found that the A118G polymorphism does predict alcohol dependence in  
277 male patients upon accounting for 2D:4D, suggesting *OPRM1* and sex hormones interact in the  
278 prenatal state to influence addiction risk in adult life. Additionally, 2D:4D and *OPRM1* A118G  
279 interact to predict more readmissions (1 vs  $\geq 2$ ) in male patients; the group of patients with no recorded  
280 alcohol-related readmissions was excluded because it does not account for possible hospital  
281 readmissions outside the Erlangen area. The hypothesized interaction between prenatal sex hormone  
282 load and MOR signaling has recently been confirmed in a rodent study, in which intraperitoneal  
283 injection of pregnant dams with the potent androgen receptor antagonist flutamide resulted in  
284 significantly reduced ventral striatal *OPRM1* RNA expression and reduced alcohol consumption in the  
285 adult male offspring (Huber et al., in press). Other studies indirectly corroborate this finding. Prenatal  
286 stress, which is associated with children's 2D:4D, has been shown to influence adult pain sensitivity in  
287 a sex-specific manner (Butkevich et al., 2007), and prenatal exposure to cigarette smoke – another  
288 contributor to prenatal androgen load (Lenz et al., 2017) – reduces adult ventral striatal reward  
289 response (Müller et al., 2013) and also interacts with the *OPRM1* rs2281617 SNP to elevate adolescent  
290 dietary fat preference (Lee et al., 2015). Our findings in combination with these studies suggest  
291 organizational sex hormone signaling may induce lasting changes to the endogenous opioid system  
292 and mesolimbic reward pathway.

293 The functional effects of the A118G polymorphism may explain how 2D:4D and *OPRM1*  
294 A118G interact to influence alcohol dependence. Previously, the G-allele was shown to confer both  
295 activational and inhibitory effects on mesolimbic reward signaling in that it increases receptor binding  
296 affinity for  $\beta$ -END but also impairs *OPRM1* transcription, making it an unreliable predictor of alcohol  
297 dependence. However, after integrating 2D:4D values in our analyses, the G-allele becomes  
298 significantly associated with elevated risk, as prenatal androgens have been shown to increase *OPRM1*

299 RNA expression irrespective of genotype and thus eliminate the protective, inhibitory effects of the G-  
300 allele on receptor expression (Huber et al., in press). This 2D:4D-*OPRM1* A118G interaction may also  
301 explain why the G-allele tends to protect against dependence risk in our cohort of female study  
302 subjects (OR = 1.91,  $p = 0.091$ ) – females are exposed to far lower amounts of prenatal sex hormones  
303 than males and therefore should retain the protective, inhibitory effects of the G-allele. Additional *in*  
304 *vitro* and animal experiments will be required to establish the exact mechanism of the prenatal sex  
305 hormone-*OPRM1* interaction, although androgen- and estrogen-induced epigenetic modifications in  
306 the form of DNA methylation may be a promising starting point (Ghahramani et al., 2014).

307 In addition to *OPRM1* variation, we measured serum  $\beta$ -END level in healthy subjects and  
308 alcohol-dependent patients at baseline and during early alcohol withdrawal. At time of recruitment,  
309 patients' serum  $\beta$ -END did not significantly differ from controls' but strongly declined during  
310 withdrawal in both males and females, which is consistent with previous studies in males (Esel et al.,  
311 2001; Marchesi et al., 1996) and reveals this effect to be unrelated to sex. This finding indicates that  
312 both male and female patients may depend on alcohol to maintain a homeostatic serum  $\beta$ -END level.

313 At this time, it is unclear how  $\beta$ -END relates to withdrawal. In the NOAH cohort,  $\beta$ -END  
314 level was not associated with follow-up outcome in either sex, except for one questionable finding that  
315 may be a false positive. The lack of association may be due to several reasons. Previous studies have  
316 found peripheral  $\beta$ -END and brain  $\beta$ -END to be under independent regulation, so our serum  
317 measurements may not accurately represent the effects of withdrawal on brain  $\beta$ -END processing  
318 (Veening et al., 2012). Also, in our analyses, we have compared  $\beta$ -END level during acute withdrawal  
319 with long-term outcome when it is unclear whether  $\beta$ -END is stable or dynamic throughout the  
320 withdrawal period.  $\beta$ -END level after longer withdrawal intervals may prove to be a stronger predictor  
321 of long-term outcome.

322 Interestingly, in a study completed by Racz et al. (2008), female mice tended to be more  
323 affected by  $\beta$ -END deficiency with regard to physical withdrawal severity than male mice – an  
324 observation which validates our finding that CIWA-Ar withdrawal severity score correlates negatively  
325 with serum  $\beta$ -END concentration during withdrawal in females but not in males. Both  $\beta$ -END  
326 deficiency and female sex contribute to a higher functioning HPA axis (Goel et al., 2014). Thus,

327 endogenous opioid production and biological sex may converge on the HPA axis to influence  
328 withdrawal-induced stress – an interaction that further highlights sex differences in the etiology of  
329 alcohol dependence and outcome. Sex hormone signaling may also exert direct effects on  $\beta$ -END  
330 production. A previous study from our group found that the number of CAGn repeats within exon 1 of  
331 the androgen receptor (AR) gene correlates negatively with promoter methylation of the  $\beta$ -END  
332 precursor gene – pro-opiomelanocortin – and that this methylation is partly responsible for the  
333 association between the AR CAGn variant and alcohol craving (Muschler et al., 2014). Understanding  
334 these sex effects is of high clinical interest, as it may shed light on the mechanisms of current  
335 withdrawal treatments, such as acamprosate, which has been found to both improve withdrawal  
336 symptoms and reverse withdrawal  $\beta$ -END deficiency (Hammarberg et al., 2009; Zalewska-Kaszubska  
337 and Czarnecka, 2005).

338         There are several limitations to our approach. The associational study design prohibits us from  
339 establishing a causal role for prenatal sex hormones in influencing *OPRM1*. Our assessment of 2D:4D-  
340 genotype interactions in predicting outcome is limited by the low number of G-carriers who  
341 readmitted to the hospital. We also have not corrected for multiple hypothesis testing. Furthermore,  
342 prenatal sex hormone load is measured indirectly using 2D:4D as a biological proxy, although it is  
343 quite reliable (Zheng and Cohn, 2011).

344         Previous studies report controversial results regarding the role of the *OPRM1* A118G SNP in  
345 alcohol dependence. Here we show that upon analyzing findings by sex, AA genotype significantly  
346 predicts alcohol-related hospital readmission, number of readmissions, and days until first  
347 readmissions in male patients. Additionally, upon accounting for sex and 2D:4D – a biomarker for  
348 prenatal sex hormone load – the *OPRM1* G-allele significantly predicts alcohol dependence and  
349 outcome. Serum  $\beta$ -END level during withdrawal was also found to relate sex-specifically to outcome,  
350 as it correlates negatively with CIWA-Ar withdrawal severity in females but not in males. Since this  
351 study is limited by its associational design, future work is needed to assess whether prenatal sex  
352 hormones influence alcohol dependence and outcome by directly influencing *OPRM1* and  $\beta$ -END or  
353 whether prenatal sex hormones and the opioid system are independent predictive factors of risk.  
354 However, given the existing wealth of information on the cross-regulation between opioid and sex

355 hormone signaling, the observations collected here support a novel mechanism of addiction  
356 pathogenesis.

357

### 358 **Declarations**

#### 359 *Ethics approval and consent to participate*

360 The NOAH study was previously approved by the Ethics Committee of the Medical Faculty of  
361 the Friedrich-Alexander University Erlangen-Nürnberg (NOAH study ID 81\_12) and was in  
362 accordance with the sixth revision of the Declaration of Helsinki, set forth by the World Medical  
363 Association (Seoul, 2008), as well as the International Conference on Harmonization Guidelines for  
364 Good Clinical Practice (1996).

365

#### 366 *Conflict of Interest*

367 The authors do not declare any personal or financial conflicts of interest.

368

#### 369 *Funding*

370 This work was supported by intramural grants from the University Hospital of the Friedrich-  
371 Alexander University Erlangen-Nürnberg (FAU) and the Fulbright U.S. Student Program. The funders  
372 had no role in the study design, data collection, analysis, decision to publish, or preparation of the  
373 manuscript.

374

#### 375 *Authors' contributions*

376 JBG, CM, and BL designed the study. JBG performed the *OPRM1* variant genotyping, and  
377 CM and BL performed the serum  $\beta$ -END ELISAs. CW and BL checked patients' medical records for  
378 alcohol-related hospital readmission. JBG and BL performed the statistical analyses and wrote the first  
379 draft of the paper. All authors contributed in a substantial way to the project, provided feedback on the  
380 manuscript, and approved the final version for publication.

381

#### 382 *Acknowledgment*

383 We thank the German-American Fulbright Kommission and the Institute of International  
384 Education for selecting this project for funding. We gratefully appreciate the support of Dr. Birgit  
385 Braun, Juliane Behrens, Franziska Kreß, Sarah Kubis, Katrin Mikolaiczik, Juliana Monti, Marcel-  
386 René Muschler, Hedy Riesop, Sarah Saigali, Marina Sibach, and Petya Tanovska in recruiting  
387 patients, technical support, and 2D:4D quantification. We also thank Dr. Andreas Ahnert, Ute Hamers,  
388 and Dr. Kristina Bayerlein for the opportunity to recruit patients at the Klinikum am Europakanal  
389 Clinic for Psychiatry, Psychotherapy, and Psychosomatics and their continued support.

390

### 391 **References**

392 Bach, P., Vollstädt-Klein, S., Kirsch, M., Hoffmann, S., Jorde, A., Frank, J., et al., 2016. Increased  
393 mesolimbic cue-reactivity in carriers of the mu-opioid receptor gene *OPRM1* A118G polymorphism  
394 predicts drinking outcome: a functional imaging study in alcohol dependent subjects. *Eur.*  
395 *Neuropsychopharmacol.* 25, 1128-35.

396

397 Barr, C.S., Schwandt, M., Lindell, S.G., Chen, S.A., Goldman, D., Suomi, S.J., et al., 2007.  
398 Association of a functional polymorphism in the mu-opioid receptor gene with alcohol response and  
399 consumption in male rhesus macaques. *Arch. Gen. Psychiatry* 64, 369-76.

400

401 Bart, G., Kreek, M.J., Ott, J., LaForge, K.S., Proudnikov, D., Pollak, L., et al., 2005. Increased  
402 attributable risk related to a functional mu-opioid receptor gene polymorphism in association with  
403 alcohol dependence in central Sweden. *Neuropsychopharmacology* 30, 417-22.

404

405 Beery, A.K., Zucker, I., 2011. Sex bias in neuroscience and biomedical research. *Neurosci. Biobehav.*  
406 *Rev.* 35, 565-72.

407

408 Berenbaum, S.A., Byrk, K.K., Nowak, N., Quigley, C.A., Moffat, S., 2009. Fingers as a marker of  
409 prenatal androgen exposure. *Endocrinology* 150, 5119-24.

410

411 Bernardi, R.E., Zohsel, K., Hirth, N., Treutlein, J., Heilig, M., Laucht, M., et al., 2016. A gene-by-sex  
412 interaction for nicotine reward: evidence from humanized mice and epidemiology. *Transl. Psychiatry*  
413 6, e861.

414

415 Bond, C., LaForge, K.S., Tian, M., Melia, D., Zhang, S., Borg, L., et al., 1998. Single-nucleotide  
416 polymorphism in the human mu opioid receptor gene alters  $\beta$ -endorphin binding and activity: possible  
417 implications for opiate addiction. *Proc. Natl. Acad. Sci. USA* 95, 9608-13.

418

419 Brown, E.C.Z., Steadman, C.J., Lee, T.M., Padmanabhan, V., Lehman, M.N., Coolen, L.M., 2015. Sex  
420 differences and effects of prenatal exposure to excess testosterone on ventral tegmental area dopamine  
421 neurons in adult sheep. *Eur. J. Neurosci.* 41, 1157-66.

422

423 Butkevich, I.P., Barr, G.A., Vershinina, E.A., 2007. Sex differences in formalin-induced pain in  
424 prenatally stressed infant rats. *Eur. J. Pain.* 11, 888-94.

425

426 Chen, D., Liu, L., Xiao, Y., Peng, Y., Yang, C., Wang, Z., 2012. Ethnic-specific meta-analyses of  
427 association between the *OPRM1* A118G polymorphism and alcohol dependence among Asians and  
428 Caucasians. *Drug Alcohol. Depend.* 123, 1-6.

429

430 Esel, E., Sofuoglu, S., Aslan, S.S., Kula, M., Yabanoglu, I., Turan, M.T., 2001. Plasma levels of beta-  
431 endorphin, adrenocorticotrophic hormone and cortisol during early and late alcohol withdrawal.  
432 *Alcohol* 36, 572-6.

433

434 Garbutt, J.C., Kranzler, H.R., O'Malley, S.S., Gastfriend, D.R., Pettinati, H.M., Silverman, B.L., et al.,  
435 2005. Efficacy and tolerability of long-acting injectable naltrexone for alcohol dependence: a  
436 randomized controlled trial. *JAMA* 293, 1617-25.

437



- 438 Ghahramani, N.M., Ngun, T.C., Chen, P.Y., Tian, Y., Krishnan, S., Muir, S. et al., 2014. The effects  
439 of perinatal testosterone exposure on the DNA methylome of the mouse brain are late-emerging. *Biol.*  
440 *Sex Differ.* 5, 8.
- 441
- 442 Gianoulakis, C., Dai, X., Brown, T., 2003. Effect of chronic alcohol consumption on the activity of the  
443 hypothalamic-pituitary-adrenal axis and pituitary  $\beta$ -endorphin as function of alcohol intake, age, and  
444 gender. *Alcohol Clin. Exp. Res.* 27, 410-423.
- 445
- 446 Goel, N., Workman, J.L., Lee, T.T., Innala, L., Viau, V., 2014. Sex differences in the HPA axis.  
447 *Compr. Physiol.* 4, 1121-55.
- 448
- 449 Hammarberg, A., Jayaram-Lindström, N., Beck, O., Franck, J., Reid, M.S., et al., 2009. The effects of  
450 acamprosate on alcohol-cue reactivity and alcohol priming in dependent patients: a randomized  
451 controlled trial. *Psychopharmacology (Berl.)* 205, 53-62.
- 452
- 453 Heilig, M., Goldman, D., Berrettini, W., O'Brien, C.P., 2011. Pharmacogenetic approaches to the  
454 treatment of alcohol addiction. *Nature Reviews Neuroscience* 12, 670-684.
- 455
- 456 Huber, S., Zoicas, I., Reichel, M., Mühle, C., Büttner, C., Ekici, A., et al., in press. Prenatal androgen-  
457 receptor activation determines adult alcohol and water drinking in a sex-specific way. *Addict. Biol.*  
458 doi: 10.1111/adb.12540.
- 459
- 460 Kleinjan, M., Rozing, M., Engels, R.C., Verhagen, M., 2015. Co-development of early adolescent  
461 alcohol use and depressive feelings: the role of the mu-opioid receptor A118G polymorphism.  
462 *Development and Psychopathology* 27, 915-25.
- 463
- 464 Kornhuber, J., Erhard, G., Lenz, B., Kraus, T., Sperling, W., Bayerlein, K., et al., 2011. Low digit ratio  
465 2D:4D in alcohol dependent patients. *PLoS One* 6, e19332.

466

467 Kornhuber, J., Zenses, E.M., Lenz, B., Stoessel, C., Bouna-Pyrrou, P., Rehbein, F., et al., 2013. Low  
468 2D:4D values are associated with video game addiction. PLoS One 8, e79539.

469

470 Kranzler, H.R., Gelernter, J., O'Malley, S., Hernandez-Avila, C.A., Kaufman, D., 1998. Association  
471 of alcohol or other drug dependence with alleles of the mu opioid receptor gene (*OPRM1*). Alcohol  
472 Clin. Exp. Res. 22, 1359-62.

473

474 Lee, K.W., Abrahamowicz, M., Leonard, G.T., Richer, L., Perron, M., Veillette, S., et al., 2015.  
475 Prenatal exposure to cigarette smoke interacts with *OPRM1* to modulate dietary preference for fat. J.  
476 Psychiatry Neurosci. 40, 38-45.

477

478 Lenz, B., Mühle, C., Braun, B., Weinland, C., Bouna-Pyrrou, P., Behrens, J. et al., 2017. Prenatal and  
479 adult androgen activities in alcohol dependence. Acta. Psychiatr. Scand. 136, 96-107.

480

481 Mague, S.D., Isiegas, C., Huang, P., Liu-Chen, L.Y., Lerman, C., Blendy, J.A., 2009. Mouse model of  
482 *OPRM1* (A118G) polymorphism has sex-specific effects on drug-mediated behavior. Proc. Natl.  
483 Acad. Sci. USA 106, 10847-52.

484

485 Marchesi, C., Chiodera, P., Ampollini, P., Volpi, R., Coiro, V., 1997. Beta-endorphin  
486 adrenocorticotrophic hormone and cortisol secretion in abstinent alcoholics. Psychiatry Res. 72, 187-94.

487

488 Müller, K.U., Mennigen, E., Ripke, S., 2013. Altered reward processing in adolescents with prenatal  
489 exposure to maternal cigarette smoking. JAMA Psychiatry 70, 847-56.

490

491 Muschler, M.A., Lenz, B., Hillemacher, T., Kraus, C., Kornhuber, J., Frieling, H., et al., 2014. CAGn  
492 repeat of the androgen receptor is linked to proopioidmelanocortin promoter methylation-relevance for  
493 craving of male alcohol-dependent patients? Psychopharmacology (Berl.) 231, 2059-66.

494

495 O'Malley, S.S., Robin, R.W., Levenson, A.L., GreyWolf, I., Chance, L.E., Hodgkinson, C.A., et al.,  
496 2008. Naltrexone alone and with sertraline for the treatment of alcohol dependence in Alaska natives  
497 and non-natives residing in rural settings: a randomized controlled trial. *Alcohol Clin. Exp. Res.* 32,  
498 1271-83.

499

500 Oslin, D.W., Berrettini, W., Kranzler, H.R., Pettinati, H., Gelernter, J., Volpicelli, J.R., et al., 2003. A  
501 functional polymorphism of the mu-opioid receptor gene is associated with naltrexone response in  
502 alcohol-dependent patients. *Neuropsychopharmacology* 28, 1546-52.

503

504 Racz, I., Schürmann, B., Karpushova, A., Reuter, M., Cichon, S., Montag, C., et al., 2008. The opioid  
505 peptides enkephalin and beta-endorphin in alcohol dependence. *Biol. Psychiatry* 64, 989-97.

506

507 Ramchandani, V.A., Umhau, J., Pavon, F.J., Ruiz-Velasco, V., Margas, W., Sun, H., et al., 2011. A  
508 genetic determinant of the striatal dopamine response to alcohol in men. *Mol. Psychiatry* 16, 809-817.

509

510 Ray, L.A., Hutchison, K.E., 2004. A polymorphism of the mu-opioid receptor gene (*OPRM1*) and  
511 sensitivity to the effects of alcohol in humans. *Alcohol Clin. Exp. Res.* 28, 1789-95.

512

513 Ray, L.A., Bujarski, S., MacKillop, J., Courtney, K.E., Monti, P.M., Miotto, K., 2013. Subjective  
514 response to alcohol among alcohol dependent individuals: effects of the mu-opioid receptor (*OPRM1*)  
515 gene and alcoholism severity. *Alcohol Clin. Exp. Res.* 37, E116-124.

516

517 Schacht, J.P., Randall, P.K., Latham, P.K., Voronin, K.E., Book, S.W., Myrick, H., et al., 2017.  
518 Predictors of naltrexone response in a randomized trial: reward-related brain activation, *OPRM1*  
519 genotype, and smoking status. *Neuropsychopharmacology*, [Epub ahead of print].

520

521 Schwantes-An, T.H., Zhang, J., Chen, L.S., Hartz, S.M., Culverhouse, R.C., Chen, X., et al., 2016.  
522 Association of the *OPRM1* variant rs1799971 (A118G) with non-specific liability to substance  
523 dependence in a collaborative *de novo* meta-analysis of European-Ancestry cohorts. *Behav. Genet.* 46,  
524 151-69.  
525  
526 Stuppaeck, C.H., Barnas, C., Falk, M., Guenther, V., Hummer, M., Oberbauer, H. et al., 1994.  
527 Assessment of the alcohol withdrawal syndrome – validity and reliability of the translated and  
528 modified Clinical Institute Withdrawal Assessment for Alcohol scale (CIWA-A). *Addiction* 89, 1287-  
529 92.  
530  
531 van den Wildenberg, E., Wiers, R.W., Dessers, J., Janssen, R.G., Lambrichs, E.H., Smeets, H.J., et al.,  
532 2007. A functional polymorphism of the mu-opioid receptor gene (*OPRM1*) influences cue-induced  
533 craving for alcohol in male heavy drinkers. *Alcohol Clin. Exp. Res.* 31, 1-10.  
534  
535 Veening, J.G., Gerrits, P.O., Barendregt, H.P., 2012. Volume transmission of beta-endorphin via the  
536 cerebrospinal fluid; a review. *Fluids Barriers CNS* 9, 16.  
537  
538 Zalewska-Kaszubska, J., Czarnecka, E., 2005. Deficit in beta-endorphin peptide and tendency to  
539 alcohol abuse. *Peptides* 26, 701-5.  
540  
541 Zhang, Y., Wang, D., Johnson, A.D., Papp, A.C., Sadée, W., 2005. Allelic expression imbalance of  
542 human mu opioid receptor (*OPRM1*) caused by variant A118G. *J. Biol. Chem.* 280, 32618-24.  
543  
544 Zheng, Z., Cohn, M.J., 2011. Developmental basis of sexually dimorphic digit ratios. *Proc. Natl. Acad.*  
545 *Sci. USA* 108, 16289-94.  
546  
547  
548

549 **Figures**

550

551 **Table 1.** RefSNP numbers and PCR conditions for the three SNPs genotyped in this study. rs3798677

552 and rs3798678 are silent variants located within the *OPRM1* promoter.

553

| RefSNP                              | rs1799971 |                     | rs3798677                 |          | rs3798678                  |          |       |
|-------------------------------------|-----------|---------------------|---------------------------|----------|----------------------------|----------|-------|
| Nucleotide                          | c.A118G   |                     | A>G                       |          | A>G                        |          |       |
| Amino acid                          | p.N40D    |                     | -                         |          | -                          |          |       |
| Primers                             | Fwd       | CCCGGTTCTGGGTCAACT  | ATTAGCCCCAAAAGAGATG       |          | GTTGAGCAATATGAAGGCCATGATG  |          |       |
|                                     | Rev       | GACCGCATGGGTCGGACAG | TTTCATAAGTTCACAATAGAGTCAA |          | GGAGGAAGGACACATTTAGAATCCAG |          |       |
| Size (bp)                           | 58        |                     | 65                        |          | 84-100                     |          |       |
| [MgCl <sub>2</sub> ] (mM)           | 2.0       |                     | 3.0                       |          | 2.5                        |          |       |
| T <sub>A</sub> (°C)                 | 63        |                     | 60                        |          | 58                         |          |       |
|                                     | Patients  | Controls            | Patients                  | Controls | Patients                   | Controls |       |
| Absolute genotype frequencies (m/f) | NN        | 83/75               | 103/82                    | 72/61    | 79/84                      | 72/61    | 79/84 |
|                                     | Nn        | 28/12               | 28/24                     | 34/24    | 49/18                      | 34/24    | 49/18 |
|                                     | nn        | 2/0                 | 2/1                       | 7/2      | 5/5                        | 7/2      | 5/5   |

554

555 Fwd forward, Rev reverse, T<sub>A</sub> PCR annealing temperature, m male, f female

556

557 **Table 2.** Absolute *OPRM1* CAn genotype frequencies.

| Genotype | Absolute genotype frequencies |                |
|----------|-------------------------------|----------------|
|          | Patients (m/f)                | Controls (m/f) |
| 1015     | 0/0                           | 1/0            |
| 1016     | 1/0                           | 0/0            |
| 1017     | 1/0                           | 1/0            |
| 1416     | 1/1                           | 1/0            |
| 1417     | 0/0                           | 0/1            |
| 1515     | 8/3                           | 11/4           |
| 1516     | 10/10                         | 10/8           |
| 1517     | 27/17                         | 34/18          |
| 1518     | 5/3                           | 5/3            |
| 1616     | 1/2                           | 5/5            |
| 1617     | 15/16                         | 18/20          |
| 1618     | 1/0                           | 5/4            |
| 1717     | 32/25                         | 34/34          |
| 1718     | 11/10                         | 7/9            |
| 1818     | 0/0                           | 1/1            |

558

559 m male, f female

560

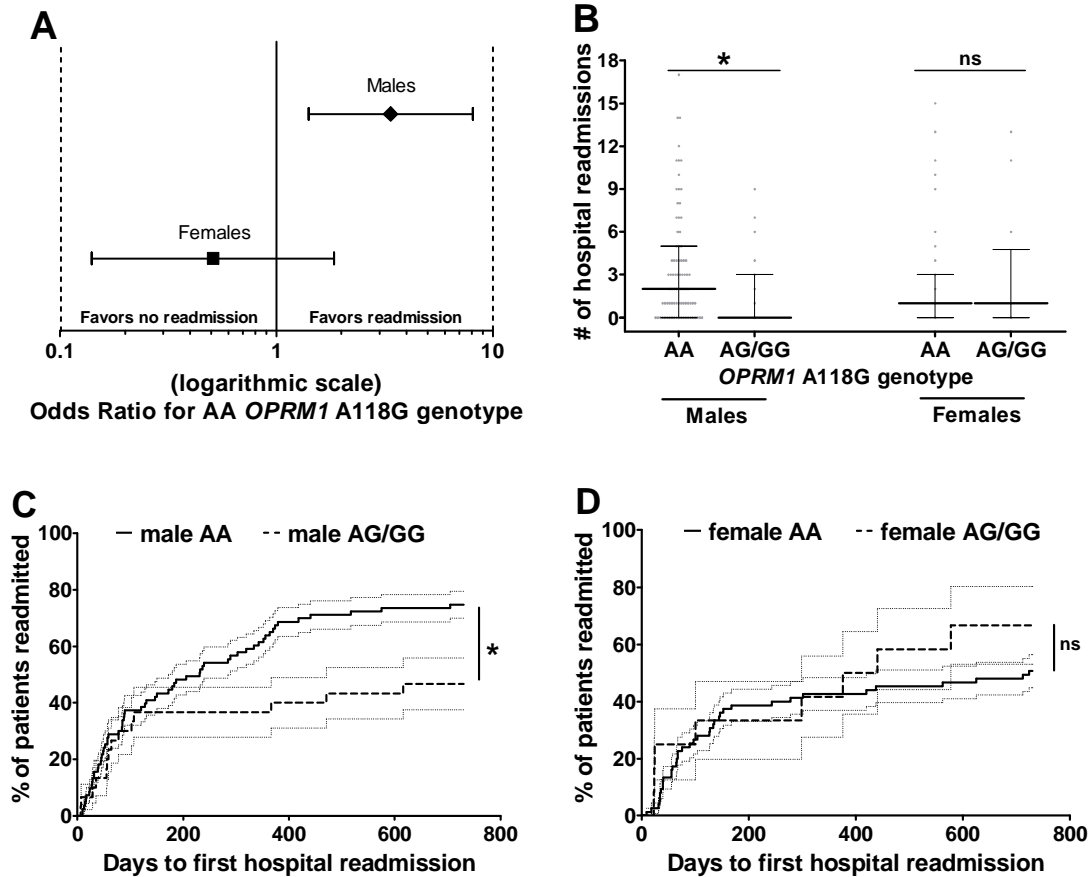

561

562

563 **Figure 1. Effect of *OPRM1* A118G genotype on prospective alcohol-related hospital readmission**  
 564 **during the 24-month follow-up**

565 (A) A118G AA genotype is associated with elevated readmission risk in males (OR = 3.37 [95%-CI  
 566 1.41-8.07],  $\chi^2 = 7.863$ ,  $p = 0.005$ ) but not in females (OR = 0.51 [95%-CI 0.14-1.85],  $\chi^2 = 1.063$ ,  $p =$   
 567 0.303). (B) AA males had a higher median number of readmissions than male G-allele carriers (AA: 2  
 568 [IQR 0-5], AG/GG: 0 [IQR 0-3], Mann-Whitney U test,  $U = 869.0$ ,  $p = 0.012$ ), whereas genotype did  
 569 not predict number of readmissions in females (AA: 1 [IQR 0-3], AG/GG: 1 [0-5], MWT,  $U = 399.5$ ,  
 570  $p = 0.509$ ). Data are presented as median  $\pm$  IQR. (C) AA males had fewer mean days until first  
 571 readmission than male G-allele carriers (AA:  $313.3 \pm 30.6$ , AG/GG:  $457.7 \pm 57.9$ , Log-rank [Mantel-  
 572 Cox] test,  $\chi^2 = 5.562$ ,  $p = 0.018$ ). (D) There was no difference in days until first readmission between  
 573 AA females and female G-allele carriers (AA:  $447.7 \pm 35.9$ , AG/GG:  $398.8 \pm 83.0$ , Log-rank [Mantel-  
 574 Cox] test,  $\chi^2 = 0.913$ ,  $p = 0.339$ ). C and D show survival curves  $\pm$  SEM. OR odds ratio, 95%-CI 95%-  
 575 confidence interval. \* $p < 0.05$ , ns not significant.

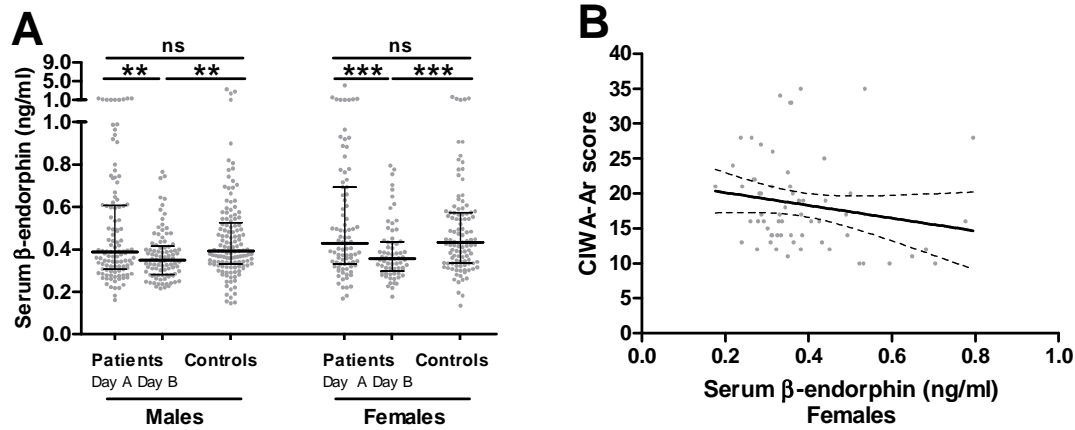

576

577 **Figure 2. Sex-specific serum  $\beta$ -END level in study subjects and correlation of day B  $\beta$ -END level**  
578 **with withdrawal severity in female patients**

579 (A) There was no difference in serum  $\beta$ -END level between patients and controls at baseline (male  
580 patients: 0.388 ng/ml [IQR 0.307-0.607], male controls: 0.392 ng/ml [IQR 0.330-0.526], Mann-  
581 Whitney *U* test,  $U = 7507.0$ ,  $p = 0.989$ ; female patients: 0.428 ng/ml [IQR 0.331-0.692], female  
582 controls: 0.433 ng/ml [IQR 0.335-0.574], Mann-Whitney *U* test,  $U = 4638.0$ ,  $p = 0.966$ ). During  
583 withdrawal of a median of 5 days, patient serum  $\beta$ -END level declined (Wilcoxon signed-rank tests,  
584 male patients:  $z = -3.2$ ,  $p = 0.001$ , female patients:  $z = -3.5$ ,  $p < 0.001$ ) to a lower level than in control  
585 subjects (male patients: 0.348 ng/ml [IQR 0.280-0.415], Mann-Whitney *U* test,  $U = 4627.0$ ,  $p = 0.001$ ;  
586 female patients: 0.356 ng/ml [IQR 0.297-0.435], Mann-Whitney *U* test,  $U = 2525.0$ ,  $p < 0.001$ ). Data  
587 are shown as median  $\pm$  IQR. Two outliers – one male and one female control – above 10 ng/ml  $\beta$ -END  
588 level are not shown. (B) Serum  $\beta$ -END level on day B correlated significantly with severity of alcohol  
589 withdrawal syndrome, quantified by the CIWA-Ar score (Spearman-Rho,  $n = 62$ ,  $\rho = -0.282$ ,  $p =$   
590  $0.026$ ). Dotted lines represent the 95% confidence intervals of the best-fit from a linear regression  
591 analysis. CIWA-Ar Clinical Institute Withdrawal Assessment for Alcohol revised scale, IQR  
592 interquartile range, \*\* $p = 0.001$ , \*\*\* $p < 0.001$ , ns not significant.

593

594

595

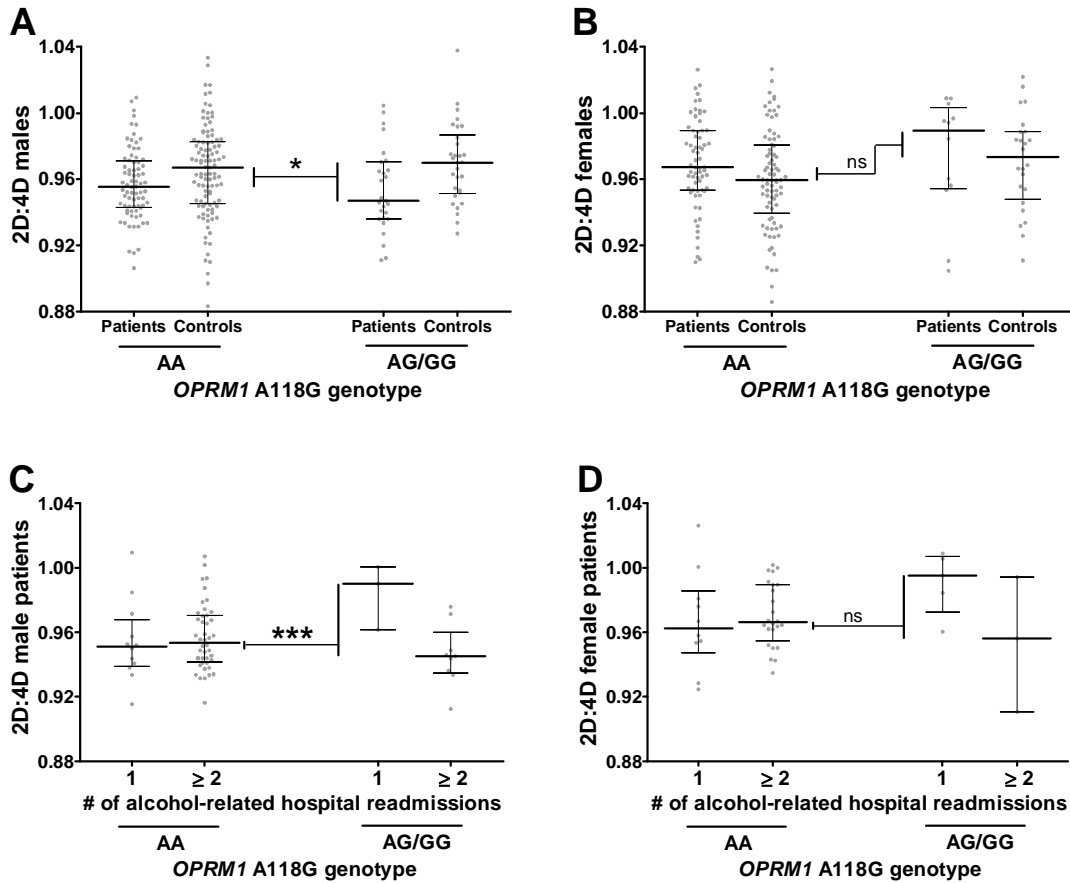

596

597

598 **Figure 3. Sex-specific interaction of *OPRM1* A118G genotype with 2D:4D in risk and course of**  
599 **alcohol dependence**

600 (A) We sex- and genotype-specifically normalized patients' 2D:4D values to the mean 2D:4D and  
601 standard deviation of the control group and found that male G-allele carrier patients deviated  
602 significantly from AA males with regard to the normalized 2D:4D values (normalized 2D:4D;  
603 AG/GG: n = 27, median = -0.941, AA: n = 76, median = -0.331, Mann-Whitney *U* test, *U* = 742.0, *p* =  
604 0.033). (B) This difference was not observed in females (normalized 2D:4D; AG/GG: n = 12, median  
605 = 0.639, AA: n = 67, median = 0.240, Mann-Whitney *U* test, *U* = 375.0, *p* = 0.712). (C) 2D:4D value  
606 of each patient with at least two readmissions was sex- and genotype-specifically normalized to the  
607 mean 2D:4D and standard deviation of patients with one readmission; these normalized values  
608 differed significantly between G-allele carriers and AA study subjects in males (normalized 2D:4D;  
609 AG/GG: n = 9, median = -1.922, AA: n = 44, median = -0.020, Mann-Whitney *U* test, *U* = 23.0, *p* <  
610 0.001) but not in females (D; normalized 2D:4D; AG/GG: n = 3, median = -1.771, AA: n = 24, median



25 Gegenhuber et al.

*OPRM1*,  $\beta$ -endorphin, and alcohol dependence

611 = -0.025, Mann-Whitney *U* test,  $U = 14.0$ ,  $p = 0.090$ ). Data shown as median  $\pm$  interquartile range. \* $p$

612 < 0.05, \*\*\*  $p < 0.001$ , ns not significant.

613
